# Supplementary material for: Impact of Broadening Trial Eligibility Criteria for Patients with Advanced Non–Small Cell Lung Cancer: Real-World Analysis of Select ASCO- Friends Recommendations
Source: Oxford University Press journal article supplement (doi:10.1158/1078-0432.ccr-20-3857), 2021-02-09
Supplement: 10780432ccr203857-sup-252839_2_supp_6776491_ql3hcm.docx [file 10780432ccr203857-sup-252839_2_supp_6776491_ql3hcm.docx]

**Appendix:**

**Table A1: ICD-9-CM Neoplasm Terms for Lung Cancer**

| **Site** | **ICD-9-CM** |
| --- | --- |
| MALIGNANT NEOPLASM OF TRACHEA, BRONCHUS AND LUNG |  |
| Traches | 162.0 |
| Main bronchus | 162.2 |
| Upper lobe, bronchus or lung | 162.3 |
| Middle lobe, bronchus or lung | 162.4 |
| Lower lobe, bronchus or lung | 162.5 |
| Other parts of bronchus or lung | 162.8 |
| Bronchus and lung, unspecified | 162.9 |
| MALIGNANT NEOPLASM OF PLEURA |  |
| Parietal pleura | 163.0 |
| Visceral pleura | 163.1 |
| Other specified parts of pleura | 163.8 |
| Pleura, unspecified | 163.9 |
| MALIGNANT NEOPLASM OF OTHER AND ILL-DEFINED SITES WITHIN THE RESPIRATORY SYSTEM AND INTRATHORACIC ORGANS |  |
| Upper respiratory tract, part unspecified | 165.0 |
| Other | 165.8 |
| Ill-defined sites within the respiratory system | 165.9 |
| MALIGNANT NEOPLASM OF OTHER AND ILL-DEFINED SITES |  |
| Thorax | 195.1 |
| SECONDARY AND UNSPECIFIED MALIGNANT NEOPLASM OF LYMPH NODES |  |
| Intrathoracic lymph nodes | 196.1 |
| SECONDARY MALIGNANT NEOPLASM OF RESPIRATORY AND DIGESTIVE ORGANS |  |
| Secondary malignant neoplasm of lung | 197.0 |
| Secondary malignant neoplasm, pleura | 197.2 |
| Secondary malignant neoplasm, other respiratory organs | 197.3 |
| Malignant carcinoid tumors of other and unspecified sites |  |
| Malignant carcinoid tumors of the bronchus and lung | 209.21 |
| CARCINOMA IN SITU OF RESPIRATORY SYSTEM |  |
| Trachea | 231.1 |
| Bronchus and lung | 231.2 |
| Other specified parts of respiratory system | 231.8 |
| Respiratory system, part unspecified | 231.9 |

**Table A2: ICD-10-CM Neoplasm Terms for Lung Cancer**

| **Site** | **ICD-10-CM** |
| --- | --- |
| MALIGNANT NEOPLASM OF LARYNX | C32.X |
| MALIGNANT NEOPLASM OF TRACHEA | C33.X |
| MALIGNANT NEOPLASM OF  BRONCHUS AND LUNG |  |
| Malignant neoplasm of main bronchus | C34.0X |
| Malignant neoplasm of upper lobe, bronchus or lung | C34.1X |
| Malignant neoplasm of middle lobe, bronchus or lung | C34.2 |
| Malignant neoplasm of lower lobe, bronchus or lung | C34.3X |
| Malignant neoplasm of overlapping sites of bronchus and lung | C34.8X |
| Malignant neoplasm of unspecified part of bronchus or lung | C34.9X |
| Malignant carcinoid tumor of the bronchus and lung | C7A.090 |
| MALIGNANT NEOPLASM OF HEART, MEDIASTINUM AND PLEURA |  |
| Malignant neoplasm of pleura | C38.4 |
| Malignant neoplasm of pleura | C38.4 |
| Malignant neoplasm of pleura | C38.4 |
| Malignant neoplasm of pleura | *C38.4 |
| MALIGNANT NEOPLASM OF HEART, MEDIASTINUM AND PLEURA |  |
| Malignant neoplasm of overlapping sites of heart, mediastinum and pleura | C38.8 |
| MALIGNANT NEOPLASM OF OTHER AND ILL-DEFINED SITES IN THE RESPIRATORY SYSTEM AND INTRATHORACIC ORGANS |  |
| Malignant neoplasm of upper respiratory tract, part unspecified | C39.0 |
| Malignant neoplasm of lower respiratory tract, part unspecified | C39.9 |
| Malignant neoplasm of lower respiratory tract, part unspecified | C39.9 |
| MALIGNANT NEOPLASM OF OTHER AND ILL-DEFINED SITES |  |
| Malignant neoplasm of thorax | C76.1 |
| SECONDARY AND UNSPECIFIED MALIGNANT NEOPLASM OF LYMPH NODES |  |
| Secondary and unspecified malignant neoplasm of intrathoracic lymph nodes | C77.1 |
| SECONDARY MALIGNANT NEOPLASM OF RESPIRATORY AND DIGESTIVE ORGANS |  |
| Secondary malignant neoplasm of lung | C78.0X |
| Secondary malignant neoplasm of pleura | C78.2 |
| Secondary malignant neoplasm of other and unspecified respiratory organs | C78.3X |
| Malignant carcinoid tumors of others site |  |
| Malignant carcinoid tumor of the bronchus and lung | C7A.090 |
| CARCINOMA IN SITU OF MIDDLE EAR AND RESPIRATORY SYSTEM |  |
| Carcinoma in situ of trachea | D02.1 |
| Carcinoma in situ of bronchus and lung | D02.2X |
| Carcinoma in situ of other parts of respiratory system | D02.3 |
| Carcinoma in situ of respiratory system, unspecified | D02.4 |

**Table A3: ICD9/ICD10 Neoplasm Codes for Other Primary Cancers**

| **Site** | **ICD9 Code** | **ICD10 Code** |
| --- | --- | --- |
| Malignant neoplasms of lip, oral cavity and pharynx | 140-149 | C00-C14 |
| Malignant neoplasms of digestive organs | 150-159 | C15-C26 |
| Malignant neoplasms of respiratory and intrathoracic organs | 160, 161, 164 | C30, C31 |
| C37-C39 |
| Malignant neoplasms of bone and articular cartilage | 170 | C40-C41 |
| Melanoma | 172 | C43 |
| Malignant neoplasms of mesothelial and soft tissue | 171 | C45-C49 |
| Malignant neoplasms of breast | 174, 174 | C50-C50 |
| Malignant neoplasms of female genital organs | 184, 180, 182, 179, 183, 181 | C51-C58 |
| Malignant neoplasms of male genital organs | 187, 185, 186 | C60-C63 |
| Malignant neoplasms of urinary tract | 189, 188 | C64-C68 |
| Malignant neoplasms of eye, brain and other parts of central nervous system | 190, 192, 195 | C69-C72 |
| Malignant neoplasms of thyroid and other endocrine glands | 193, 194 | C73-C75 |
| Malignant neoplasms of other and ill-defined sites | 195, 199 | C76, C80 |
| Malignant neuroendocrine tumors | 209.20, 209.22-209.29; 209.3 | C7A00-C7A029; C7A091-C7A098 |
| Secondary neuroendocrine tumors | 209.7 | C7B-C7B |
| Malignant neoplasms of lymphoid, hematopoietic and related tissue | 200-208 | C81-C96 |
| Neoplasms of uncertain behavior, polycythemia vera and myelodysplastic syndromes | 235-238 | D37-D48 |
| Neoplasms of unspecified behavior | 239 | D49-D49 |
|  |  |  |
| Note: Patients with evidence of any primary malignancy in table in addition to lung cancer dx code will be considered ineligible for clinical trial | | |
| See table A5 for exceptions to this rule |  |  |
|  |  |  |
| **Table A4: Brain Malignancy ICD 9/10** |  |  |
|  |  |  |
| **Site** | **ICD9 Code** | **ICD10 Code** |
| Malignant Neoplasm of Brain | 191.X | C71.X |
| Secondary Malignant Neoplans of Brain | 198.3 | C79.3 |

**Table A5: Most Common Metastatic Sites From Lung**

| **Site** | **ICD9 Code** | **ICD10 Code** |
| --- | --- | --- |
| adrenal gland | 194.0 | C74.xx |
| bone | 170.x | C40.xx, C41.xx |
| brain, other CNS sites | 192.x | C70.0, C70.9, C72.xx |
| liver | 155.0 | C22.x |

Note: If patient has primary lung cancer dx code, and another primary code to any of these above codes, assume the above codes were incorrectly coded as primary when they should be secondary (i.e., NSCLC metastases).
